# Supplementary material for: Clinicopathological study of surgically treated non-neoplastic diseases of the pancreas with special reference to autoimmune pancreatitis
Source: Research Square preprint supplement (doi:10.21203/rs.3.rs-2066003/v1), 2022-09-19
Supplement: Supplementary file 1 [file 858c2233bf3dce7ef318ad0b.pdf]

**Table 1. Breakdown of false-positive cases by etiology: 1979-2008 vs. 2009-2018**

| Etiology                                                          | 1979-2008 | 2009-2018 | Total     |
|-------------------------------------------------------------------|-----------|-----------|-----------|
| <u>Number of resection</u>                                        |           |           |           |
| Total number                                                      | 675       | 1289      | 1964      |
| Neoplastic disease                                                | 615       | 1278      | 1896      |
| Non-neoplastic disease                                            | 57 (8.4%) | 11 (0.9%) | 68 (3.5%) |
| <u>Non-neoplastic disease</u>                                     |           |           |           |
| Clinically suspicious (false-positive)                            | 51 (7.6%) | 11 (0.9%) | 62 (3.2%) |
| Known benign disease (ACP)                                        | 6         | 0         | 6         |
| <u>False-positive</u>                                             |           |           |           |
| Tumor-forming                                                     | 40 (5.9%) | 11 (0.9%) | 51 (2.6%) |
| ACP                                                               | 8         | 0         | 8         |
| NACP                                                              | 32        | 11        | 43        |
| Stenosis of larger pancreatic duct without apparent tumor forming | 11        | 0         | 11        |
| <u>TFCP (NACP)</u>                                                |           |           |           |
| Total number                                                      | 32 (4.7%) | 11 (0.9%) | 43 (2.2%) |
| Unknown etiology                                                  | 18 (2.7%) | 6 (0.5%)  | 24 (1.2%) |
| AIP                                                               | 14 (2.1%) | 5 (0.4%)  | 19 (1.0%) |

ACP, alcoholic chronic pancreatitis; NACP, non-alcoholic chronic pancreatitis;  
TFCP, tumor-forming chronic pancreatitis; AIP, autoimmune pancreatitis
