# Supplementary material for: Clinicopathological study of surgically treated non-neoplastic diseases of the pancreas with special reference to autoimmune pancreatitis
Source: Research Square preprint supplement (doi:10.21203/rs.3.rs-2066003/v1), 2022-09-19
Supplement: Supplementary file 2 [file c6c49c3a5b91dff5642ea271.pdf]

**Table 2.** Anatomical distribution of tumor-forming pancreatitis in 51 patients with false-positive disease with a focus on AIP (n=19)

| Disease distribution                                                                                                                                                                                                 |  | No. of patients<br>(No. of patients with AIP) |
|----------------------------------------------------------------------------------------------------------------------------------------------------------------------------------------------------------------------|--|-----------------------------------------------|
| <b>Focal/segmental</b>                                                                                                                                                                                               |  | <b>39 (12)</b>                                |
| 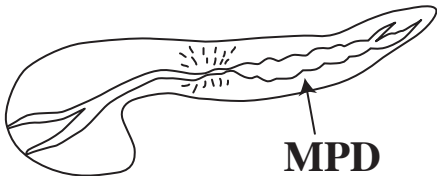<br><br><b>Head</b><br><b>Body</b><br><b>Tail</b> |  |                                               |
|                                                                                                                                                                                                                      |  | <b>21 (5)</b>                                 |
|                                                                                                                                                                                                                      |  | <b>10 (5)</b>                                 |
|                                                                                                                                                                                                                      |  | <b>8 (2)</b>                                  |
| <b>Diffuse</b>                                                                                                                                                                                                       |  | <b>12 (7)</b>                                 |
| <br><b>Head-body</b><br><b>Body-tail</b>                                                                                          |  |                                               |
|                                                                                                                                                                                                                      |  | <b>5 (3)</b>                                  |
|                                                                                                                                                                                                                      |  | <b>7 (4)</b>                                  |

AIP, autoimmune pancreatitis; MPD, main pancreatic duct; CBD, common bile duct
